1 ***Pseudomonas aeruginosa* reaches collective decisions via transient segregation**  
2 **of quorum sensing activities across cells**

3

4

5 Priyanikha Jayakumar<sup>1\*</sup>, Stephen A. Thomas<sup>2,3</sup>, Sam P. Brown<sup>2,3</sup>, Rolf Kümmerli<sup>1\*</sup>

6

7 <sup>1</sup> Department of Quantitative Biomedicine, University of Zürich, Winterthurerstrasse 190,  
8 8057 Zürich, Switzerland

9 <sup>2</sup> School of Biological Sciences, Georgia Institute of Technology, USA

10 <sup>3</sup> Center for Microbial Dynamics and Infection, Georgia Institute of Technology, GA,  
11 USA.

12

13 **\*Corresponding authors**

14 Priyanikha Jayakumar, [priyanikha.jayakumar@uzh.ch](mailto:priyanikha.jayakumar@uzh.ch); Rolf Kümmerli,  
15 [rolf.kuemmerli@uzh.ch](mailto:rolf.kuemmerli@uzh.ch)

16

17 **Running title:** Coordinated decisions via transient segregation

18

19 **Abstract**

20 Bacteria engage in a cell-to-cell communication process called quorum sensing (QS) to  
21 coordinate expression of cooperative exoproducts at the group level. While population-  
22 level QS-responses are well studied, we know little about commitments of single cells to  
23 QS. Here, we use flow cytometry to track the investment of *Pseudomonas aeruginosa*  
24 individuals into their intertwined Las and Rhl QS-systems. Using fluorescent reporters,  
25 we show that QS gene expression (signal synthase, receptor and exoproduct) was  
26 heterogenous and followed a gradual instead of a sharp temporal induction pattern. The  
27 simultaneous monitoring of two QS genes revealed that cells transiently segregate into  
28 low receptor (*lasR*) expressers that fully commit to QS, and high receptor expressers  
29 that delay QS commitment. Our mathematical model shows that such gene expression  
30 segregation could mechanistically be spurred by transcription factor limitation. In  
31 evolutionary terms, temporal segregation could serve as a QS-brake to allow for a bet-  
32 hedging strategy in unpredictable environments.

## 33 **Introduction**

34 Bacterial cells typically communicate with each other via quorum sensing (QS) to  
35 coordinate collective behaviour at the group level<sup>1-3</sup>. One of the most widespread QS  
36 systems involves N-acyl homoserine lactone (AHL) signalling molecules that are  
37 produced by a signal synthase and subsequently accumulate both intra- and  
38 extracellularly<sup>4</sup>. Upon reaching a threshold concentration, typically at high population  
39 density, QS signals bind to their cognate QS receptors to form complexes that serve as  
40 transcriptional regulators. These signal-receptor dimer complexes upregulate the  
41 expression of signalling molecules in a positive feedback loop<sup>5,6</sup>. Subsequently, they  
42 upregulate the expression of a range of collective behaviour, including production of  
43 secreted proteases to digest food<sup>7</sup>, biosurfactants for group motility<sup>8</sup>, toxins to attack  
44 competitors<sup>9</sup> and the formation of multi-cellular biofilms<sup>10,11</sup>. QS regulation plays a  
45 crucial role in determining the lifestyle of bacteria<sup>12,13</sup>, and their virulence in the context  
46 of infections<sup>2,3,14</sup>.

47 QS is extremely well studied in many taxa, including *Pseudomonas*, *Vibrio* and  
48 *Bacillus* spp.<sup>4,15-17</sup>. It is generally assumed that gene expression patterns and  
49 phenotypes observed at the group level are representative of what individual cells do  
50 within the population. However, this assumption conflicts with studies showing inter-  
51 individual differences in gene expression are common among clonal cells even under  
52 uniform environmental conditions<sup>18-21</sup>. An important question that therefore arises is  
53 whether and to what extent the coordinated QS response observed at the group level is  
54 driven by heterogeneous gene expression at the individual cell level. Several single-cell  
55 studies have reported considerable variation across cells in their QS gene expression.  
56 For example, high inter-individual variation in QS activation occurred at low cell density

57 in *Pseudomonas putida*, which later on converged across cells at higher population  
58 density<sup>11</sup>. Another set of single-cell studies showed that inter-individual heterogeneity in  
59 QS gene expression and phenotypes persisted even at high population density in  
60 species such as *Vibrio harveyi*, *Pseudomonas syringae* and *Xanthomonas campestris*<sup>22–</sup>  
61 <sup>24</sup>. Additional heterogeneity could arise in cases where bacteria can have multiple QS  
62 systems, which are often regulatorily linked to one another through positive and negative  
63 feedbacks<sup>25–27</sup>. Here, heterogeneity in one QS system could propagate to a regulatorily  
64 linked second QS system, which could potentially lead to a segregation in gene  
65 expression activity, with the extreme case being that subgroups of cells specialize and  
66 communicate via different channels<sup>28,29</sup>.

67 Here, we aim to quantify patterns of single-cell gene expression heterogeneity in  
68 the multi-layer QS system of the opportunistic human pathogen *Pseudomonas*  
69 *aeruginosa*. This bacterium features two AHL-dependent QS systems, termed Las and  
70 Rhl<sup>9,27</sup>. Each system comprises its own AHL signal (Las: 3O-C12-HSL; Rhl: C4-HSL), its  
71 specific receptor, LasR and RhlR, and a set of downstream QS-controlled traits (e.g.,  
72 LasB exoprotease and rhamnolipid biosurfactants synthesized by the RhlAB proteins).  
73 The two QS systems are arranged in a hierarchical signalling cascade where the Las  
74 system positively regulates the Rhl system through the LasIR transcriptional regulator  
75 dimer<sup>9</sup>. The two systems are often involved in regulating the expression of similar  
76 traits<sup>30</sup>, and together regulate the expression of almost 6% of the *P. aeruginosa*  
77 genome<sup>31</sup>.

78 In this hierarchical QS system, heterogeneity in gene expression can occur at the  
79 level of the signal, receptor and downstream genes, and the existing regulatory  
80 feedbacks could foster positive or negative correlations in gene expression between

81 genes of the same or the interlinked QS system. We first designed chromosomally  
82 integrated single mCherry fluorescent reporter systems for six QS genes (Las system:  
83 *lasI*, *lasR*, *lasB*; and Rhl system: *rhlI*, *rhlR*, *rhlA*) to track and quantify temporal gene  
84 expression patterns and heterogeneity across single cells in clonal populations growing  
85 from low (QS-off) to high (QS-on) cell density. Next, we built a mathematical model of a  
86 simple QS regulatory circuit to identify the key elements and conditions required for  
87 heterogeneity to spur negative gene expression correlations (i.e., segregation into  
88 different expresser phenotypes) across cells. Finally, we designed double fluorescent  
89 reporters to monitor expression correlations of two QS genes in individual cells. We  
90 constructed signal-receptor (*lasI-lasR* and *rhlI-rhlR*) and receptor-downstream product  
91 (*lasR-lasB* and *rhlR-rhlA*) gene reporter pairs to quantify within-QS system gene  
92 expression correlations; and receptor (*lasR-rhlR*) and downstream product (*lasB-rhlA*)  
93 gene reporter pairs to compare across-QS systems gene expression correlations. This  
94 study design allows us to obtain a first comprehensive view on gene expression  
95 variation within the QS signalling cascade across cells and time within growing clonal  
96 populations.

97

## 98 **Results**

### 99 **Las and Rhl systems are not required but are induced during growth in a nutrient** 100 **rich environment**

101 To study QS gene expression in *P. aeruginosa* PAO1, we required a medium where  
102 cells grow well and the QS network is induced. Figure 1 shows that these conditions are  
103 fulfilled in the nutrient rich Lysogeny broth (LB) medium during batch culture growth.  
104 When following gene expression of the QS signal synthase, the QS receptor, and the

105 QS-regulated downstream genes of the Las and Rhl systems, we found all QS genes  
106 began to be expressed in the mid exponential phase and peaked in the stationary phase  
107 of culture growth (Fig. 1a-b). The gene expression kinetics measured with a plate reader  
108 further revealed that the promoter strengths differed across genes. For all QS genes, the  
109 expression increased gradually across time, and the induction pattern followed the  
110 expected temporal order from signal synthase, to receptor, to the downstream gene.

111 We further assessed whether the QS systems are needed for growth in the  
112 nutrient rich LB environment. We used isogenic PAO1 mutants, deficient in the  
113 production of either one of the two QS receptors LasR ( $\Delta lasR$ ), RhlR ( $\Delta rhlR$ ), or both  
114 receptors ( $\Delta lasR-\Delta rhlR$ ). We found that all QS mutants grew similarly compared to the  
115 wild type during the exponential phase (Fig. 1c). However, growth trajectories diverged  
116 afterwards: while the wild type strain reached stationary phase relatively early, all QS  
117 mutants continued to grow and reached significantly higher growth yields than the wild  
118 type (one-way ANOVA,  $F_{3,20} = 42.81$ ,  $p < 0.0001$ , TukeyHSD pairwise comparisons:  
119 mutants vs. wild type, all comparisons  $P_{adj} < 0.0001$ ). These fitness patterns suggest  
120 that expressing one or both QS systems is costly, and does not result in a net benefit  
121 during growth in LB medium. This observation is expected as LB is a rich medium and  
122 no QS-regulated traits are required for growth and survival.

123

#### 124 **QS gene expression is switched off after constant exposure to low cell density**

125 As the expression of QS genes peaks in the stationary phase cultures, we predicted that  
126 cells from overnight cultures are already expressing these QS genes. We indeed found  
127 this to be true for all the six QS genes in our study (Fig. 2a). However, we aimed to start  
128 our main experiments with cells that show no QS activity. To switch off the QS activity in

129 cells, we repeatedly re-inoculated cells from overnight cultures to a low cell density  
130 environment. We observed that QS gene expression became indistinguishable from  
131 background fluorescence after two re-inoculation steps (i.e., 6 hours at low cell density,  
132 Fig. 2a), while the housekeeping genes (*rpsL*, *recA* and *rpoD*) remained constantly  
133 expressed (Fig. 2b). Consequently, we applied the two-step re-inoculation procedure  
134 prior to all single-cell experiments to obtain a starting population of QS-off cells.

135

### 136 **Single-cell expression of QS genes follows a sigmoidal increase across time**

137 Next, we moved to the single-cell level and used flow cytometry to quantify patterns of  
138 QS and housekeeping gene expression across cells in growing clonal populations over  
139 time, starting with populations of QS-off cells at low cell density (Fig. 3). Consistent with  
140 our findings at the batch-culture level (Fig. 1), we observed a transition from an “off” (0<sup>th</sup>  
141 hour) to “on” state (18<sup>th</sup> hour) for the expression of all *las* and *rhl* genes. The induction of  
142 QS gene expression across time followed sigmoidal functions (Fig. 3a-b), as would be  
143 expected for a QS system. However, the transition from off to on was not sharp at a  
144 particular time point, but occurred more gradually across several hours. When looking at  
145 the distribution of gene expression across cells, we found bimodal patterns for *lasB*, *rhlI*  
146 and *rhlR*, as cells switched from off to on at different time points. In contrast, gene  
147 expression distribution was unimodal for *lasI*, *lasR* and *rhlA* at all time points  
148 (Supplementary Fig. 1a). The temporal expression patterns of QS genes differed  
149 markedly from those of the housekeeping genes, which were already expressed at 0<sup>th</sup>  
150 hour and remained constitutively expressed through time (Fig. 3c).

151 We then tested whether these gene expression patterns can be recovered when  
152 using GFP as the fluorescent reporter. This was possible due to our collection of double

153 gene expression reporters (Supplementary Table 1), which had all QS genes linked to  
154 *gfp*, too. We were indeed able to recover the sigmoidal expression functions for all QS  
155 genes except *lasI* (Supplementary Fig. 2). The expression of *lasI*-GFP showed a  
156 transient increase in *lasI* expression and followed a quadratic function over time. We  
157 observed further differences between the mCherry and GFP reporters. First,  
158 fluorescence signals were picked up earlier for GFP than for mCherry, suggesting higher  
159 sensitivity for the former. Second, the bimodal gene expression patterns observed with  
160 mCherry disappeared with GFP (Supplementary Fig. 1b), indicating that the bimodality  
161 might be a specific feature of mCherry, and as a consequence of this, we refrain from  
162 providing a biological interpretation of the observed bimodality.

163  
164 **QS gene expression heterogeneity peaks during the transition from exponential to**  
165 **stationary growth phase**

166 We then quantified the level of heterogeneity in QS gene expression using the data from  
167 all single mCherry QS-gene reporters across the three experimental replicates. For each  
168 QS-gene reporter, time point and replicate, we calculated the coefficient of variation  
169 (CV) in gene expression across 50,000 cells (Fig. 4). Our statistical model revealed that  
170 the CV in gene expression was significantly influenced by the gene type (i.e., *las* vs. *rhl*  
171 vs. housekeeping genes; ANCOVA:  $F_{2,234} = 52.57$ ,  $p < 0.0001$ ), time (quadratic term:  
172  $F_{1,234} = 218.34$ ,  $p < 0.0001$ ) and their interaction ( $F_{2,234} = 6.42$ ,  $p = 0.0019$ ). Specifically,  
173 CV was significantly higher for the *las* and *rhl* genes than for the housekeeping genes  
174 (TukeyHSD pairwise comparisons: *las* and *rhl* genes vs. housekeeping genes, both  
175 comparisons  $P_{\text{adj}} < 0.0001$ ). Moreover, we observed that the CV peaked at intermediate  
176 time points (between the 9<sup>th</sup> and the 11<sup>th</sup> hour) for all gene groups studied, suggesting



177 that gene expression is particularly heterogeneous during the exponential growth phase  
178 and during the activation and build-up of the QS response. CV values decreased for all  
179 genes when populations entered the stationary phase. Another way of quantifying the  
180 level of heterogeneity is to compare the standard deviations across samples, especially  
181 with log transformed data as in our case<sup>32</sup>. We followed this approach and recovered the  
182 same qualitative differences in single-cell gene expression heterogeneity across  
183 reporters and time points (Supplementary Fig. 4).

184

185 **Negative correlations between two QS genes can arise with limited transcription**  
186 **factor availability and low numbers of competing binding sites**

187 Given the numerous positive feedback loops in the QS regulon, the null hypothesis is  
188 that the expression of any two QS genes should correlate positively across cells. The  
189 hypothesis is based on the fact that the master transcription factor (TF) of the QS  
190 regulon, the Las signal-receptor dimer, positively regulates the expression of the *lasI*  
191 signal, the *las*-downstream genes and the *rhl* regulon<sup>3,27,33</sup>. Accordingly, low or high TF  
192 concentration in a cell should trigger low and high expression of all QS genes,  
193 respectively, and thus lead to positive gene expression correlations across cells.

194 Here, we develop a mathematical model to explore whether there are conditions  
195 that could also lead to negative gene expression correlations and thus spur segregation  
196 in gene expression behaviour among cells in clonal populations. We model promoter  
197 binding and unbinding as a stochastic process, using the Gillespie algorithm<sup>34</sup>.  
198 Specifically, our model focuses on the Las signal-receptor dimer as the key TF in the *P.*  
199 *aeruginosa* QS regulon (Fig. 5a) and builds on the idea that this TF could be a limiting  
200 factor in the system<sup>35</sup>. In a first version of the model, we considered a simple scenario

201 where a limited number of TFs (1 - 20) compete for the binding sites of two focal genes  
202 A and B within a cell. We consistently found that the expression of A and B correlated  
203 negatively across cells, whereby the strength of the negative association declined with  
204 increasing TF availability (Fig. 5b). This result makes intuitive sense as under stringent  
205 TF limitation, a cell can express either A or B, but rarely both genes. Next, we  
206 implemented the biologically relevant feature that in QS systems the TFs compete for  
207 more than two binding sites (up to 20 in our analysis). We observed that the strength of  
208 the negative gene expression correlations between the two focal genes declined with  
209 more competing binding sites (Fig. 5b). This result also makes intuitive sense as a  
210 limited number of TFs are distributed across many binding sites, thereby weakening  
211 gene expression correlations between any two genes within the system. Overall, our  
212 model shows that negative gene expression correlations can manifest when TF  
213 availability and the number of competing binding sites are low (Fig. 5c).

214

### 215 **Characterization of the double QS gene expression reporter system**

216 The results of the model motivated us to experimentally quantify the simultaneous  
217 investment of individual cells into two QS genes over time, and to test whether gene  
218 expression correlated positively or negatively across cells. For this purpose, we  
219 constructed a series of double gene expression reporters (Supplementary Fig. 5,  
220 Supplementary Table 1, see materials and methods), where the biologically 'earlier'  
221 gene in the QS cascade (e.g., *lasR*) was fused with GFP, while the biologically 'later'  
222 gene (e.g., *lasB*) was fused with mCherry. We conducted a series of control experiments  
223 to test the properties of our double reporter constructs. First, we confirmed that the  
224 promoterless double reporter does not show any fluorescence activity (Supplementary

225 Fig. 5a). Second, we demonstrated that there is no fluorescence leakage between the  
226 two fluorescence channels (Supplementary Fig. 5b-c). This is important as the two  
227 reporters are sequentially arranged and activity in one promoter could trigger the  
228 expression of both fluorescence genes.

229 Finally, we tested for positive correlations between the GFP and mCherry signals  
230 in constructs where both fluorescent genes were fused to the same promoter. The first  
231 test involved the housekeeping gene, *rpsL*, whose promoter was fused to both GFP and  
232 mCherry. We found positive correlations between the two fluorescence signals for all  
233 time points (Fig. 6a and Supplementary Fig. 6). The Spearman's rank correlation  
234 coefficient was highest during the early hours ( $\rho = 0.87$ ) and lowest at intermediate  
235 hours ( $\rho = 0.55$ ). The second test involved a QS gene, *lasB*, whose promoter was fused  
236 to both GFP and mCherry (Fig. 6b and Supplementary Fig. 6). Here, we observed no  
237 correlation between the two fluorescence readouts during the early hours (up to the 6<sup>th</sup>  
238 hour,  $\rho = 0.03$ ), as the gene is not expressed. At later time points, strong positive  
239 correlations built up between the two fluorescence signals ( $\rho = 0.69$ ). These control  
240 experiments yielded three pieces of information. (i) The observed p-values were  
241 consistently below one, suggesting that there is substantial intrinsic noise in promoter  
242 activities within each cell. (ii) The GFP signal appeared earlier than the mCherry signal  
243 (Fig. 6b, 6<sup>th</sup> vs. 9<sup>th</sup> hour). (iii) Bimodal gene expression patterns were only observed with  
244 mCherry but not with GFP. The two latter points confirmed our observations made with  
245 the single-gene reporters.

246

247 **Coordinated QS response involves transient segregation in gene expression**  
248 **activities**

249 We then used our main collection of double reporters to quantify the investment of  
250 individual cells into the expression of two QS genes. For all the gene pairs studied  
251 (Supplementary Table 1), we found weak or no correlations in the fluorescence signals  
252 across QS genes during the early hours of the growth cycle (Fig. 6, up to the 6<sup>th</sup> hour).  
253 This is expected as the QS genes are not expressed during this period. From the 9<sup>th</sup>  
254 hour onwards, QS genes began to be expressed, and a diverse set of correlation  
255 patterns ranging from no, to positive and negative correlations in gene expression  
256 across cells arose (Fig. 7).

257 In the Las system (Fig. 7a), there were very weak positive correlations between  
258 the expression of *lasI*-GFP and *lasR*-mCherry across cells at all time points, and  
259 negative correlations in the expression of *lasR*-GFP and its downstream gene *lasB*-  
260 mCherry, especially at intermediate time points (9<sup>th</sup>-15<sup>th</sup> hour). These patterns suggest  
261 that subpopulations of cells transiently segregate into either high *lasR* or high *lasB*  
262 expressers. In the Rhl system (Fig. 7b), there were strong positive correlations between  
263 the expression of *rhlI*-GFP and *rhlR*-mCherry from intermediate time points onwards,  
264 while a delayed build-up of positive correlations occurred in the expression of *rhlR*-GFP  
265 and *rhlA*-mCherry (Fig. 7b).

266 We then examined gene expression patterns across the Las and Rhl systems  
267 (Fig. 7c). We found negative correlations between the expression of *lasR*-GFP and *rhlR*-  
268 mCherry at intermediate time points (9<sup>th</sup>-12<sup>th</sup> hour), which then became weakly positive  
269 at later time points. As above, the negative correlations indicate that cells within the  
270 clonal population transiently segregate into either high *lasR* or high *rhlR* expressers. In  
271 contrast, we found strong positive correlations between the expression of the QS  
272 downstream genes, *lasB*-GFP and *rhlA*-mCherry, a pattern we also confirmed with the

273 marker swap control (*lasB*-mCherry and *rhIA*-GFP, Supplementary Fig. 7). Moreover, all  
274 cells expressed both *lasB* and *rhIA* from the 15<sup>th</sup> hour onward (Supplementary Fig. 8).  
275 This shows that despite temporal segregation at the level of Las receptor expression,  
276 the end stage of all cells is full QS commitment. It is worth noting that other links  
277 between the two QS systems exist, which we did not include here. For example, *lasB*  
278 expression is also responsive to the Rhl signal-receptor dimer<sup>30</sup>, albeit at a much lower  
279 affinity<sup>36</sup>. Hence, that is why we considered *lasB* as being a primarily Las-dependent  
280 trait, following previous studies<sup>37,38</sup>. In any case, such additional positive links are  
281 predicted to further contribute to the full QS commitment of all cells at the end stage, as  
282 observed in our experiments.

283 To follow up on the negative gene expression correlations involving LasR, we  
284 examined whether segregation in gene expression among cells occurred along a  
285 continuum from low to high *lasR* expression, or whether there were discrete  
286 subpopulations of low and high *lasR* expressers. Our analysis based on 2D density plots  
287 strongly support the latter scenario (Fig. 8). For both gene pairs (*lasR-lasB* and *lasR-*  
288 *rhIR*), we first observed a homogenous increase in *lasR* expression at the 6<sup>th</sup> hour  
289 followed by a split into two subpopulations: (1) cells that further increased *lasR*  
290 expression, but neither expressed *lasB* nor *rhIR* (blue box in Fig. 8); and (2) cells that  
291 kept *lasR* expression constant, and started expressing *lasB* and *rhIR* (red box in Fig. 8).  
292 Overall, this suggests that there is a strong preference for cells to either highly express  
293 *lasR* or the Las-regulated downstream genes during the early activation of QS. Over  
294 time, the fraction of high *lasR* expressers in the population declined, leaving behind a  
295 rather uniform population of cells expressing all the three genes (*lasR*, *lasB*, *rhIR*).

296

## 297 **Discussion**

298 The common view on communication via quorum sensing (QS) is that bacteria rely on  
299 the production, release and sensing of signaling molecules to trigger coordinated actions  
300 at the group level, typically at high population density<sup>1,3,9,27,39</sup>. As QS studies are  
301 typically conducted at batch culture levels, it is largely unknown how individual cells  
302 drive the coordinated QS responses that we observe at the group level. Here, we  
303 explored QS-behavior of individual cells of the bacterium *Pseudomonas aeruginosa*,  
304 growing from low to high cell density. We focused on the two hierarchically linked QS-  
305 systems (i.e., Las inducing Rhl)<sup>9,27</sup>, and indeed found high levels of coordination among  
306 cells in their final QS response. However, the way to reach this coordinated response is  
307 much more intricate than population-level observations would suggest. First, we  
308 observed that there is considerable heterogeneity among cells in their expression of Las  
309 and Rhl signal, receptor, and downstream exoproduct genes. Second, we found that  
310 gene expression heterogeneity can lead to temporal segregation in QS gene expression  
311 activities among cells. We identified the *lasR* regulator gene as the key node in the  
312 network associated with segregation. Specifically, populations temporarily split into two  
313 discrete subpopulations: low *lasR* expressers that also expressed the downstream *lasB*  
314 and *rhlR* genes; and high *lasR* expressers that expressed neither of these two  
315 downstream genes. This segregation in gene expression activity is transient and leads  
316 to a delay in the full commitment to QS at the group level. Below, we discuss potential  
317 mechanistic and evolutionary explanations for the observed transient segregation,  
318 notably whether it just reflects a by-product of the complex regulatory circuit or whether  
319 segregation could serve as an adaptive built-in brake.

320 At the mechanistic level, most QS systems entail multiple positive feedback loops  
321 that amplify QS sensing and response within populations of cells<sup>40</sup>. In the case of *P.*  
322 *aeruginosa*, both the Las and the Rhl systems involve such positive feedbacks, where  
323 transcription factors (i.e., signal-receptor dimers) increase the expression of their own  
324 signal synthase and their respective downstream regulons<sup>9,41</sup>. Thus, the null expectation  
325 would be that the expression of any two QS genes should be positively correlated  
326 across cells. We indeed observed such positive correlations for *rhl* gene pairs (*rhlI* vs.  
327 *rhlR* and *rhlR* vs. *rhlA*, Figure 7b), suggesting that this system follows the text-book QS  
328 induction model. In contrast, the Las system clearly did not follow this null model, as  
329 correlations involving the *lasR* gene were either absent (*lasI* vs. *lasR*) or negative (*lasR*  
330 vs. *lasB* and *lasR* vs. *rhlR*). Our mathematical model offers one possible solution to this  
331 conundrum by revealing that transcription factor (TF) limitation can spur negative gene  
332 expression correlations across co-regulated genes (Fig. 5). The transcription factor, Las  
333 signal-receptor dimer, is the central node in the QS-network of *P. aeruginosa*. As the  
334 supply of active TF depends on both Las signal availability and LasR copy number, it is  
335 conceivable that its supply might be particularly low early on during QS induction<sup>35</sup>.  
336 Moreover, TF availability might be further restricted through negative-feedback loops,  
337 such as the one operating via QslA, a repressor of LasR<sup>27,42</sup>. Our model further reveals  
338 that negative correlations are particularly strong when the number of genes competing  
339 for the transcription factor is low. While the number of competing genes is supposedly  
340 high for QS, the question is whether transcriptional co-factors can temporally modulate  
341 binding priorities such that the effective number of competing genes is low during QS  
342 initiation but increasing over time thereby weakening negative gene expression  
343 correlations. Altogether, our model of TF limitation offers a parsimonious explanation for

344 the observed transient segregation among cells within the QS circuit of *P. aeruginosa*.  
345 But note that our model is also valid for other types of mechanistic constraints, such as  
346 limitations in building blocks or energy required for launching the QS cascade.

347 A further mechanistic aspect to consider is that segregation into subgroups can  
348 only occur when there is heterogeneity in gene expression in the first place. How does  
349 this variation come about? Our control experiments, where we fused the same promoter  
350 to two different fluorophores (mCherry or GFP) within the same cell revealed substantial  
351 intrinsic noise in gene expression (Fig. 6). This is especially true during the exponential  
352 growth phase, where gene expression correlation coefficients were moderately high ( $\rho =$   
353  $0.56 - 0.58$ ), given the null expectation of  $\rho = 1.00$  for purely deterministic gene  
354 expression<sup>18,19,43</sup>. A second source contributing to gene expression heterogeneity could  
355 stem from extrinsic factors. While the growth conditions in our experiment were rather  
356 uniform (shaken cultures), there is still potential for stochasticity. For example, there  
357 might be stochastic inter-cell differences in nutrient uptake, which can spur variation in  
358 metabolic states across cells and induce heterogeneity in overall gene expression  
359 activity<sup>44,45</sup>. Moreover, the very nature of QS systems operating via diffusible signals can  
360 promote extrinsic noise. The reason is that there is likely stochasticity not only in the  
361 production but also in the uptake of signals<sup>1,30,46</sup>. As QS signals are at the top of the QS  
362 cascade, heterogeneity in signal availability across cells could propagate through the  
363 QS cascade, such that cells start committing to QS at different time points. Given these  
364 considerations, there seem to be ample opportunities for heterogeneity in QS gene  
365 expression to arise among cells.

366 From an evolutionary perspective, it remains to be elucidated whether the  
367 observed temporal segregation in gene expression activity is an adaptive strategy, or



368 simply a byproduct of the complex regulatory QS circuit. For example, a common pattern  
369 observed for other traits is that all cells in a population follow the same linear gene  
370 expression trajectory, but vary in the time they do so<sup>47,48</sup>. In our QS system, such a  
371 temporal trajectory could involve the initial onset of *lasR* expression followed by an  
372 increase in the expression of its downstream genes, *lasB* and *rhIR*, which in turn causes  
373 a drop in *lasR* expression activity. While variation in the time cells embark on this  
374 trajectory is a plausible explanation for the observed gene expression segregation, not  
375 all our data necessarily fit this scenario. For example, the gene expression trajectories  
376 observed between the 6<sup>th</sup> and the 9<sup>th</sup> hour suggests a bifurcated rather than a linear  
377 trajectory, where a fraction of cells (Fig. 8, red box) keeps its *lasR* expression constant  
378 and starts expressing *lasB* and *rhIR* from the 9<sup>th</sup> hour onwards, while the second group  
379 (Fig. 8, blue box) increases the expression of *lasR* without launching *lasB* and *rhIR*  
380 expression. Irrespective of linear or bifurcated trajectories, the transition from the 12<sup>th</sup>  
381 hour onwards, from high to low *lasR* expression and the onset of *lasB* and *rhIR*  
382 expression is slow and spurs a gradual QS induction.

383         One possible evolutionary advantage of the observed segregation in gene  
384 expression could be that the delay in full QS commitment serves as an built-in brake  
385 enabling clonal groups to follow a bet-hedging strategy<sup>21,46,49</sup>. Launching the full QS  
386 response is costly (Fig. 1c) and implies a major shift in gene expression and metabolic  
387 activities<sup>31</sup>. In an unpredictable environment, where conditions may rapidly change from  
388 QS-beneficial (high cell density) to non-beneficial (low cell density) situations, it could be  
389 adaptive to have a built-in brake that delays full QS-commitment of all cells in a  
390 population. In our specific case, it would mean that the high *lasR* expressers delay  
391 commitment to QS and would thus be able to quickly transit to the QS-off lifestyle should

392 cell density diminish due to environmental changes. Fluctuating environments are  
393 common in natural settings, and bet-hedging allows cells and groups to cope and react  
394 to sudden changes in their environment<sup>50,51</sup>. Non-QS-related cases of bet-hedging have  
395 been demonstrated in several bacterial taxa in the context of static vs. shaken culturing  
396 conditions<sup>52</sup>, carbon storage and starvation<sup>53</sup>, and nitrogen fixation<sup>54</sup>. A bet-hedging  
397 strategy was also proposed as a potential explanation for the presence of QS-  
398 responsive and non-responsive subpopulations in *P. syringae* and *X. campestris*<sup>24</sup>.  
399 Here, we add to this body of work, by proposing that a putative bet-hedging mechanism  
400 could operate at the level of the main QS-regulator (LasR), a hypothesis that requires  
401 rigorous testing in future studies.

402 Finally, our study using double fluorescent gene reporters also yielded two  
403 technical insights. First, we observed that the GFP signal appears earlier than the  
404 mCherry signal for the same QS gene. This is an important factor to consider when  
405 investigating temporal succession of gene expression, as comparisons can only be  
406 made between genes linked to the same fluorophore (e.g., Fig. 1). To cope with this  
407 issue in our double fluorescent gene reporters, we fused the biologically earlier gene to  
408 GFP and the biologically later gene to mCherry. Second, we observed bimodality in the  
409 expression of certain QS genes only with the mCherry but never with the GFP marker  
410 (Supplementary Fig. 1). While this difference was not a problem for our study focusing  
411 on gene expression correlations, there is a risk of over-interpreting bimodality patterns  
412 when exclusively using single gene-reporters (i.e., mCherry in our case). Given that  
413 transient bimodal gene expression also arose for the housekeeping gene *rpsL* (Fig. 6a),  
414 we believe that bimodality could be an mCherry-specific feature. Altogether, our work  
415 with double fluorescent gene reporters strongly suggests that fluorophore combinations

416 have to be carefully chosen to avoid misinterpretation of temporal gene expression  
417 patterns.

418 In conclusion, our single-cell study reveals high heterogeneity in the expression  
419 of all QS genes during the onset of QS, and transient segregation of cells in their  
420 expression levels of *lasR* versus the downstream regulated genes *lasB* and *rhIR*. Both  
421 effects together resulted in a sigmoid, yet slowly progressing QS responses at the  
422 population level. Thus, our findings support a graded<sup>33,55</sup> and not an all-or-none gene  
423 expression transition<sup>40,56,57</sup>. While our findings support the function of QS as a means to  
424 coordinate collective actions at the group level, the path to reach collective decisions is  
425 much more intricate than population-level observations would suggest. Particularly, our  
426 insight that transient segregation delays full QS commitment raises the question of  
427 whether the delay operates as a built-in adaptive brake as part of a bet-hedging strategy  
428 or whether it is an unavoidable consequence of the complex regulatory circuit involving  
429 multiple feedback loops. While only further research can tell us more, clear is that the  
430 observed segregation leads to a gradually progressing instead of a sharp QS response  
431 at the population level.

432

## 433 **Materials and Methods**

### 434 **Bacterial strains and reporter construction**

435 We used *P. aeruginosa* PAO1 wild type strain (ATCC 15692) and its direct derivatives  
436 for all our experiments and *Escherichia coli* CC118  $\lambda$ pir for all cloning work (see  
437 Supplementary Table 1-2 for a full list of strains and plasmids used, respectively).

438 Moreover, we used clean deletion mutants deficient in the receptor of one (PAO1  $\Delta$ *lasR*,  
439 PAO1  $\Delta$ *rhIR*) or both (PAO1  $\Delta$ *lasR*  $\Delta$ *rhIR*) QS systems, constructed in our PAO1

440 background. For tracking temporal gene expression profiles, we engineered  
441 transcriptional reporter fusions in which the promoter of a gene of interest is fused to a  
442 fluorescent gene marker, *mCherry*. A single copy of the reporter construct was  
443 chromosomally integrated in the PAO1 wild type (WT) background at the neutral *attTn7*  
444 site using the mini-Tn7 system<sup>58</sup>. The detailed protocol is described elsewhere<sup>59</sup>. In  
445 brief, promoter regions of our genes of interest were amplified using the primers listed in  
446 Supplementary Table 3. The promoter regions include the start codon and the first ~100  
447 base pairs of the genes, and a stop codon (TCA) was added in the reverse primers to  
448 separate the promoter regions from the *mCherry* fluorescent gene. PCR amplified  
449 promoter regions were first inserted into the pUC18-mini-Tn7-Gm-*mCherry* vector  
450 scaffold (consisting of an empty promoter site fused to *mCherry*) using restriction  
451 enzyme sites BamHI and HindIII<sup>59</sup>, and transformed into *E. coli*. The mini-Tn7 plasmid  
452 containing the construct was then extracted and integrated into wild type *P. aeruginosa*  
453 via electroporation. From Rezzoagli *et al.*<sup>59</sup>, we used the PAO1 WT::*lasR-mcherry* and  
454 PAO1 WT::*rhIR-mcherry* reporter strains. Here, we constructed four additional gene  
455 reporters (PAO1 WT::*lasI-mcherry*, PAO1 WT::*lasB-mcherry*, PAO1 WT::*rhII-mcherry*,  
456 PAO1 WT::*rhIA-mcherry*). Moreover, we also constructed gene expression reporters for  
457 three housekeeping genes (PAO1 WT::*rpsL-mcherry*, PAO1 WT::*rpoD-mcherry*, PAO1  
458 WT::*recA-mcherry*), which we used as controls for constitutively expressed genes.  
459 Sequences of our single mCherry reporter constructs were verified by DNA Sanger  
460 sequencing (Microsynth, Switzerland).

461 Next, we constructed a double fluorescent gene expression reporter system in  
462 the PAO1 WT background, which allows us to simultaneously measure the expression  
463 of two different genes within a single cell (Supplementary Fig. 9). The double reporter

464 construct entails two sequential elements with identical structure. The first element is the  
465 *gfp* coding sequence (*gfpmut3*) that starts with the first promoter insertion site fused to  
466 *gfp* and ends with a terminator region. The second element is the *mCherry* coding  
467 sequence that starts with the second promoter insertion site fused to *mCherry* and ends  
468 with a terminator region. To construct the double reporter scaffold, we used the pUC18-  
469 mini-Tn7-Gm-mCherry vector scaffold from the single reporter construct (from above),  
470 which already has a promoter insertion site (with restriction enzymes BamHI and HindIII)  
471 fused to *mCherry*. The terminator region was inserted downstream of *mCherry* using  
472 restriction enzyme sites NsiI and SacI. The *gfp* sequence was amplified from pEX-A128-  
473 GFPmut3 using primers with two unique restriction enzymes each (listed in  
474 Supplementary Table 3) and inserted upstream of our *mCherry* construct with the  
475 restriction enzymes sites HindIII and KpnI using a T4 Ligase enzyme (Thermo Fischer  
476 Scientific). The introduction of two additional restriction enzyme sites, SpeI and PaeI in  
477 these primers allows the insertion of a promoter region upstream of *gfp* (using restriction  
478 enzymes KpnI and PaeI) and insertion of terminator region downstream of *gfp* (using  
479 restriction enzymes HindIII and SpeI). Promoter regions of genes of interest (*lasI*, *lasR*,  
480 *lasB*, *rhII*, *rhIR* and *rhIA*) were amplified using primer pairs listed in Supplementary Table  
481 3 with restriction enzyme sites KpnI and PaeI (for *gfp* fusion), or BamHI and HindIII (for  
482 *mCherry* fusion). The promoter regions are the same as described above for the single  
483 *mCherry* reporter constructs. Ribosomal binding sites (RBSs) were added upstream of  
484 the start codons of *gfp* and *mCherry*. The terminator region consists of four rho-  
485 independent terminators<sup>18</sup> and was inserted (i) in between the *gfp* and *mCherry*  
486 constructs (to avoid cross fluorescence of *gfp* into the *mCherry* channel) and (ii)  
487 downstream of the *mCherry* construct (to minimise the differences in the *gfp* and

488 *mCherry* transcriptional complexes). After the insertion of promoter regions of genes of  
489 interest, the double reporter constructs were cloned in the mini-Tn7 system in *E. coli* and  
490 later integrated into *P. aeruginosa* wild type cells via electroporation. A detailed step-by-  
491 step cloning protocol is described elsewhere<sup>59</sup>. Sequences of our double reporter  
492 constructs were verified by DNA Sanger sequencing (Microsynth, Switzerland).

493 As controls for leaky expression in our double fluorescent gene reporter  
494 construct, we constructed: (1) promoterless *gfp* and *mCherry* strain (PAO1 WT::*empty-  
495 gfp-empty-mCherry*); (2) constitutively-expressing *gfp* but promoterless *mCherry* strain  
496 (PAO1 WT::*rpsL-gfp-empty-mCherry*); and (3) promoterless *gfp* but constitutively-  
497 expressing *mCherry* (PAO1 WT::*empty-gfp-rpsL-mCherry*). For our study design, we  
498 constructed six QS double reporters to measure simultaneous expression of: (1) signal  
499 and receptor within Las and Rhl systems (PAO1 WT::*lasI-gfp-lasR-mCherry*; PAO1  
500 WT::*rhII-gfp-rhIR-mCherry*); (2) receptor and downstream product within Las and Rhl  
501 systems (PAO1 WT::*lasR-gfp-lasB-mCherry*; PAO1 WT::*rhIR-gfp-rhIA-mCherry*); (3)  
502 receptors across Las and Rhl systems (PAO1 WT::*lasR-gfp-rhIR-mCherry*); and (4)  
503 downstream products across Las and Rhl systems (PAO1 WT::*lasB-gfp-rhIA-mCherry*).  
504 The order of QS genes in our double reporter constructs was determined by the  
505 biological order of these genes within the QS cascade: from signal to receptor and  
506 subsequently to its downstream product within QS systems; and from Las to Rhl across  
507 systems. Because the GFP protein matures faster than the mCherry protein, we always  
508 fused the biologically earlier gene (e.g., *lasR*) within a given QS gene pair to *gfp*, and  
509 the biologically later gene (e.g., *lasB*) to *mCherry*. To explore the properties of our  
510 double reporter construct, we engineered three control strains: (1) PAO1 WT::*rpsL-gfp-  
511 rpsL-mCherry*, for which we expect strong positive correlations of the fluorescent signals

512 across all time points, and deviation from a perfect correlation would provide a measure  
513 of intrinsic noise; (2) PAO1 WT::*lasB-gfp-lasB-mCherry*, for which we expect strong  
514 positive correlations of the fluorescent signals to build up over time when the QS  
515 cascade is induced; (3) PAO1 WT::*rhlA-gfp-lasB-mCherry*, a promoter swap control for  
516 which we expect the same type and strength of correlation as for PAO1 WT::*lasB-gfp-*  
517 *rhlA-mCherry*. We regard (3) as an ideal control as both genes encode downstream  
518 products of the Las and Rhl systems, and we can thus verify that there is no marker  
519 effect at the end point of the QS cascade.

520

## 521 **Growth conditions**

522 Overnight cultures were inoculated from single bacterial colonies and grown in 6mL  
523 Lysogeny broth (LB), at 37°C, 220 rpm for 18 hours. Prior to experiments, overnight  
524 cultures were washed twice with 0.8% NaCl and adjusted to an optical density (OD,  
525 measured at 600 nm) of 1.0. All growth and gene expression assays were performed in  
526 LB medium. For this, cells from overnight cultures were inoculated into fresh LB medium  
527 to a final starting OD<sub>600</sub> of 0.01. For population-level experiments, cells were grown in  
528 96-well plates containing 200 µL of LB medium per well and incubated at 37°C. For  
529 single-cell experiments, cells were grown in 24-well plates containing 1.5 mL of LB  
530 medium per well and incubated at 37°C and 170rpm. For all cloning work, we used  
531 ampicillin (100 µg/µL) to select for *E. coli* transformants carrying the mini-Tn7 plasmid  
532 containing the fluorescent gene reporter constructs, and gentamicin (30 µg/µL) to select  
533 for *P. aeruginosa* transformants containing the integration of fluorescent gene reporters.  
534 LB and antibiotics were purchased from Sigma-Aldrich, Switzerland.

535



## 536 **Population level growth and gene expression assays**

537 We first conducted a population level experiment to verify that QS genes are expressed  
538 in *P. aeruginosa* in LB medium. For this, we used all six single QS gene mCherry  
539 reporters and the untagged PAO1 wild type strain (without mCherry reporter). We  
540 inoculated cells from overnight cultures into fresh LB medium to a final starting OD<sub>600</sub> of  
541 0.01 in individual wells on 96-well plates as described above. Plates were incubated at  
542 37°C in a multimode plate reader (Tecan Infinite M-200, Switzerland). We measured  
543 mCherry fluorescence (excitation: 582 nm, emission: 620 nm) and growth (OD<sub>600</sub>) every  
544 15 minutes (after a shaking event of 15 seconds) over a duration of 18 hours.  
545 Subsequently, to remove background fluorescence, we calculated the mean mCherry  
546 fluorescence intensity per time point of the untagged PAO1 wild type strain and  
547 subtracted these values from the measured mCherry fluorescence values of the QS  
548 gene reporter strains across time points. In a second experiment, we tracked the growth  
549 of PAO1 wild type strain and the three QS mutants to assess the fitness consequences  
550 of being QS-deficient in our experimental medium. Cells were prepared and grown as  
551 described above. With the plate reader, we measured growth (OD<sub>600</sub>) every 15 minutes  
552 (after a shaking event of 15 seconds) for a total of 18 hours. Total growth yield for each  
553 strain was calculated as a measure of fitness.

554

## 555 **Repeated re-inoculation of cultures to switch off QS**

556 To ensure that QS is switched off prior to the start of our single-cell experiments, we re-  
557 inoculated cells into fresh LB medium twice to consistently keep them at low cell density.  
558 This is necessary because cells in overnight bacterial cultures are in the late stationary  
559 phase, and thus most likely express QS genes. Therefore, we took the six single QS



560 gene reporters and the three housekeeping gene reporters and did the following. We  
561 inoculated cells from overnight cultures into fresh LB medium to a final starting  $OD_{600}$  of  
562 0.01 in individual wells of 24-well plates as described above. Plates were incubated at  
563 37 °C and 170 rpm. After 3 hours, 100  $\mu$ L of bacterial cell cultures were transferred into  
564 1.5 mL of fresh LB medium per well on a new 24-well plate. 100  $\mu$ L of these diluted  
565 bacterial cell cultures were removed for gene expression measurement with the flow  
566 cytometer (see detailed protocol below). Plates were incubated in the same condition as  
567 above for another 3 hours. Then, we again transferred 100  $\mu$ L of bacterial cell cultures  
568 into 1.5 mL of fresh LB medium per well on a new 24-well plate, and 100  $\mu$ L of these  
569 diluted bacterial cell cultures were removed for gene expression measurement with the  
570 flow cytometer. The remaining bacterial cell cultures (i.e., cells in 1.5 mL of LB medium  
571 per well) were the starting population ( $t = 0$ h) for all our single cell experiments. As this  
572 protocol proved useful in switching off QS gene expression, we applied it to all  
573 subsequent single-cell gene expression experiments.

574

### 575 **Time-resolved QS gene expression at the single cell level**

576 Next, we followed single-cell gene expression of QS genes using all the six single  
577 mCherry fluorescent gene reporters starting at  $t = 0$ h (where the QS systems are off)  
578 grown in 1.5 mL of LB medium in 24-well plates, incubated at 37 °C and 170 rpm over  
579 the course of 18 hours. We also measured gene expression of the housekeeping gene  
580 reporters. Due to our experimental design requiring time-dependent gene expression  
581 measurements, we split our single-cell experiments into two time blocks (i.e., on two  
582 separate days). Specifically, we set up a first set of plates with cell cultures at  $t = 0$ h,  
583 incubated the plates as described above, and measured gene expression at time points

584 0<sup>th</sup>, 3<sup>rd</sup>, 6<sup>th</sup> and 9<sup>th</sup> hour on day 1. Subsequently, we set up a second set of plates with  
585 cell cultures at t = 0h, incubated them as described above, and measured gene  
586 expression at time points 11<sup>th</sup>, 12<sup>th</sup>, 13<sup>th</sup>, 15<sup>th</sup> and 18<sup>th</sup> hour on day 2. In the follow up  
587 experiments, we used the QS double fluorescent gene reporters, along with the controls  
588 described above, to track simultaneous single-cell expression of two QS genes within  
589 and across Las and Rhl systems. The cell cultures were set up as above, except that we  
590 reduced the time points at which we measured gene expression (i.e., 0<sup>th</sup>, 3<sup>rd</sup>, 6<sup>th</sup>, 9<sup>th</sup> on  
591 day 1; and 12<sup>th</sup>, 15<sup>th</sup> and 18<sup>th</sup> on day 2). Gene expression was measured with the flow  
592 cytometer (see detailed protocol below). For this, at time point t = 3h, we removed an  
593 aliquot of 100  $\mu$ L of the growing cell cultures to measure gene expression in undiluted  
594 samples. At time point t = 6h, an aliquot of 50  $\mu$ L of cell cultures was removed, and at  
595 time point t = 9h and beyond, an aliquot of 10  $\mu$ L of cell cultures was removed, and cells  
596 were diluted in appropriate amount of 1X filter sterilized phosphate buffer saline (PBS,  
597 Gibco, ThermoFisher, Switzerland) for gene expression measurement. The above-  
598 described procedure was repeated three independent times.

599

### 600 **Flow cytometry to measure single-cell fluorescence gene expression**

601 We used FACSymphony cell analyzer (BD Bioscience, Flow Cytometry Facility,  
602 University of Zurich) to measure single-cell GFP (blue laser, excitation at 488 nm,  
603 530/30 filter) and mCherry fluorescence (yellow-green laser, excitation at 561 nm,  
604 610/20 filter). We recorded 50,000 events per sample (for each strain and for each time  
605 point) with a low flow rate. The threshold of particle detection was set to 200 V for the  
606 forward and side scatter in the Cytometer Setup and Tracking (CS&T) settings of the  
607 instrument. In the first set of experiments using single mCherry reporter strains, we used

608 PAO1 WT::*empty-mCherry* as a non-fluorescent control (as a measure of background  
609 fluorescence) and the three single constitutively expressed housekeeping gene  
610 reporters as positive control for mCherry fluorescence. In the subsequent experiments  
611 with double fluorescent gene reporters, we used the PAO1 WT::*empty-gfp-empty-*  
612 *mCherry* (non-fluorescent control as a measure of background fluorescence), PAO1  
613 WT::*rpsL-gfp-rpsL-mCherry* (positive control for both GFP and mCherry fluorescence),  
614 PAO1 WT::*rpsL-gfp-empty-mCherry* (positive control for GFP fluorescence, negative  
615 control for mCherry fluorescence) and PAO1 WT::*empty-gfp-rpsL-mCherry* (negative  
616 control for GFP fluorescence, positive control for mCherry fluorescence).

617

### 618 **Flow cytometry data processing**

619 We used FlowJo software (BD, Bioscience) for flow cytometry data analysis. To  
620 distinguish cells from background events, we gated for the most homogeneous  
621 population by applying a gate in the forward (FSC) and side scatter (SSC), and all  
622 analyses were performed on this gated population. We exported the GFP and mCherry  
623 fluorescence values for every single event recorded from FlowJo and imported into R  
624 (version 3.6.1) for further analyses and plotting. For all dataset, we first log transformed  
625 the mCherry and GFP expression values. Then, we subtracted the log transformed  
626 fluorescence values of each reporter gene at every time point by the mean of log  
627 transformed fluorescence values of the wild type non-fluorescent strains (which  
628 represents a measure of background fluorescence) for the respective time points. To be  
629 able to fit sigmoid logistic models to single-cell gene expression data, we scaled the  
630 above fluorescence values of each QS reporter gene per time point to the mean of these  
631 fluorescence values of the respective QS reporter genes at time point  $t = 0\text{h}$ . This

632 ensures that the mean QS gene expression is zero at time point  $t = 0h$ , a key  
633 requirement for model fitting.

634

## 635 **Modelling**

636 To analyze how different conditions and parameters might lead to negative correlations  
637 between gene expression levels, we developed a simple agent-based model in  
638 Mathematica version 12.1.1. The model relies on the Gillespie algorithm to simulate  
639 three coupled reactions<sup>34</sup>. Agents participating in the reactions include a generalized  
640 transcription factor (TF), promoters for two focal genes (pG1 and pG2), and a promoter  
641 for other competing genes (pGC). Each gene has its own reaction equation in the form  
642 of  $TF + pG \rightleftharpoons TFpG$ , with equal binding and unbinding rates. Model parameters are (1)  
643 the availability of the TF, and (2) the number of competing genes. We also varied  
644 binding and unbinding rates within and between the equations, but such variations did  
645 not change the qualitative results. The model implementation simulates 20,000 individual  
646 bacterial cells. It allows chemical reactions to proceed for a fixed time period and the  
647 code then records the reaction states at the end of this time. We considered a gene to  
648 be active if a TF is bound to its promoter and inactive otherwise. As the simulation only  
649 allows binary values (on or off) for each gene, we used the mean square contingency  
650 coefficient ( $\phi$ ) as a measure of correlation.

651

## 652 **Statistical analysis**

653 We performed all statistical analyses with R studio (version 3.6.1). To compare growth of  
654 wild type and QS mutants in batch cultures, we fitted a parametric growth model  
655 (SSlogis) using grofit package in R, extracted the total growth yield of each strain and

656 used one-way ANOVA and post-hoc Tukey's HSD to statistically compare them. To test  
657 whether QS gene expression is switched off after re-inoculation, we used unpaired two-  
658 sample t-tests.

659 We fitted a series of models to estimate single-cell gene expression trajectories  
660 for each QS reporter across time. Specifically, we compared general linear models  
661 (linear and quadratic functions) with non-linear sigmoid models (gompertz function), and  
662 used the Akaike information criterion (AIC) to identify the best model fit (i.e., reflected by  
663 the lowest AIC value). This step was performed on both the mCherry fluorescence data  
664 obtained from the single mCherry reporters and the GFP fluorescence data obtained  
665 from the double fluorescent gene reporters.

666 In order to assess single-cell heterogeneity in QS gene expression, we calculated  
667 the coefficient of variation (CV) and standard deviation (SD) of the log-transformed  
668 fluorescence values (without background subtraction) of the six QS gene reporters for  
669 every time point. To test whether the CV and SD varies in response to the gene type  
670 (i.e., *las* genes, *rhl* genes and housekeeping genes) and time, we first performed an  
671 analysis of co-variance (ANCOVA), with gene type as a factor, and time as covariate.  
672 We used Tukey's HSD for post-hoc pairwise comparisons between gene type. To  
673 assess the direction and strength of correlation across single cells in their expression of  
674 two genes, we calculated the Spearman's rank correlation coefficient between the  
675 expression of GFP-tagged and mCherry-tagged genes. For all data sets, we checked  
676 whether the residuals were normally distributed by referring to Q-Q plots and by  
677 consulting the results of the Shapiro-Wilk test for normality.

678

679

680 **Conflict of Interest**

681 The authors declare no conflict of interest.

682

683 **Acknowledgements**

684 We thank Chiara Rezzaogli, Michael Weigert and Subham Mridha for help in the strain  
685 construction, Tobias Wechsler, Jos Kramer, Nils Eling and Aleix Boquet-Pujadas for  
686 help with statistical analysis and curve fitting, and the Flow Cytometry Facility of  
687 University of Zurich for technical support. This work was funded by the European  
688 Research Council (ERC) under the European Union’s Horizon 2020 research and  
689 innovation programme (grant agreement no. 681295).

690

691 **Author contributions**

692 P.J. and R.K. designed the study, P.J. performed the experiments, S.A.T. and S.P.B.  
693 developed and analysed the mathematical model, P.J. and R.K. analysed the  
694 experimental data, and all authors interpreted the results and wrote the paper.

695

696 **References**

- 697 1. Popat, R., Cornforth, D. M., McNally, L. & Brown, S. P. Collective sensing and  
698 collective responses in quorum-sensing bacteria. *J. R. Soc. Interface* **12**, (2015).
- 699 2. Schuster, M., Joseph Sexton, D., Diggle, S. P. & Peter Greenberg, E. Acyl-  
700 homoserine lactone quorum sensing: From evolution to application. *Annu. Rev.*  
701 *Microbiol.* **67**, 43–63 (2013).
- 702 3. Whiteley, M., Diggle, S. P. & Greenberg, & E. P. Progress in and promise of  
703 bacterial quorum sensing research. *Nat. Publ. Gr.* (2017).

- 704 doi:10.1038/nature24624
- 705 4. Williams, P., Winzer, K., Chan, W. C. & Cámara, M. Look who's talking:  
706 Communication and quorum sensing in the bacterial world. *Philosophical  
707 Transactions of the Royal Society B: Biological Sciences* **362**, 1119–1134 (2007).
- 708 5. Fuqua, W. C., Winans, S. C. & Greenberg, E. P. Quorum sensing in bacteria: The  
709 LuxR-LuxI family of cell density- responsive transcriptional regulators. *Journal of  
710 Bacteriology* **176**, 269–275 (1994).
- 711 6. Neilson, K. H., Platt, T. & Hastings, J. W. Cellular control of the synthesis and  
712 activity of the bacterial luminescent system. *J. Bacteriol.* **104**, 313–322 (1970).
- 713 7. Wilder, C. N., Diggle, S. P. & Schuster, M. Cooperation and cheating in  
714 *Pseudomonas aeruginosa*: the roles of the *las*, *rhl* and *pqs* quorum-sensing  
715 systems. *ISME J.* **5**, 1332–1343 (2011).
- 716 8. Xavier, J. B., Kim, W. & Foster, K. R. A molecular mechanism that stabilizes  
717 cooperative secretions in *Pseudomonas aeruginosa*. *Mol. Microbiol.* **79**, 166–79  
718 (2011).
- 719 9. Nadal Jimenez, P. *et al.* The Multiple Signaling Systems Regulating Virulence in  
720 *Pseudomonas aeruginosa*. *Microbiol. Mol. Biol. Rev.* **76**, 46–65 (2012).
- 721 10. Chandler, J. R. *et al.* Mutational analysis of *Burkholderia thailandensis* quorum  
722 sensing and self-aggregation. *J. Bacteriol.* **191**, 5901–5909 (2009).
- 723 11. Cárcamo-Oyarce, G., Lumjiaktase, P., Kümmerli, R. & Eberl, L. Quorum sensing  
724 triggers the stochastic escape of individual cells from *Pseudomonas putida*  
725 biofilms. *Nat. Commun.* **6**, 5945 (2015).
- 726 12. Abisado, R. G., Benomar, S., Klaus, J. R., Dandekar, A. A. & Chandler, J. R.  
727 Bacterial quorum sensing and microbial community interactions. *mBio* **9**, (2018).

- 728 13. Mukherjee, S. & Bassler, B. L. Bacterial quorum sensing in complex and  
729 dynamically changing environments. *Nat. Rev. Microbiol.* **1** (2019).  
730 doi:10.1038/s41579-019-0186-5
- 731 14. Whiteley, M., Lee, K. M. & Greenberg, E. P. *Identification of genes controlled by*  
732 *quorum sensing in Pseudomonas aeruginosa. Proceedings of the National*  
733 *Academy of Sciences of the United States of America* **96**, (1999).
- 734 15. Venturi, V. Regulation of quorum sensing in *Pseudomonas*. *FEMS Microbiology*  
735 *Reviews* **30**, 274–291 (2006).
- 736 16. Papenfort, K. & Bassler, B. L. Quorum sensing signal-response systems in Gram-  
737 negative bacteria. *Nat. Rev. Microbiol.* **14**, 576–588 (2016).
- 738 17. Aframian, N. & Eldar, A. A Bacterial Tower of Babel: Quorum-Sensing Signaling  
739 Diversity and Its Evolution. *Annual Review of Microbiology* **74**, 587–606 (2020).
- 740 18. Cox, R. S., Dunlop, M. J. & Elowitz, M. B. A synthetic three-color scaffold for  
741 monitoring genetic regulation and noise. *J. Biol. Eng.* **4**, (2010).
- 742 19. Elowitz, M. B., Levine, A. J., Siggia, E. D. & Swain, P. S. Stochastic gene  
743 expression in a single cell. *Science (80-. )*. **297**, 1183–1186 (2002).
- 744 20. Silander, O. K. *et al.* A genome-wide analysis of promoter-mediated phenotypic  
745 noise in *Escherichia coli*. *PLoS Genet.* **8**, e1002443 (2012).
- 746 21. Ackermann, M. A functional perspective on phenotypic heterogeneity in  
747 microorganisms. *Nature Reviews Microbiology* **13**, 497–508 (2015).
- 748 22. Anetzberger, C., Pirch, T. & Jung, K. Heterogeneity in quorum sensing-regulated  
749 bioluminescence of *Vibrio harveyi*. *Mol. Microbiol.* **73**, 267–277 (2009).
- 750 23. Anetzberger, C., Schell, U. & Jung, K. Single cell analysis of *Vibrio harveyi*  
751 uncovers functional heterogeneity in response to quorum sensing signals. *BMC*



- 752            *Microbiol.* **12**, 209 (2012).
- 753    24.    Pradhan, B. B. & Chatterjee, S. Reversible non-genetic phenotypic heterogeneity  
754            in bacterial quorum sensing. *Mol. Microbiol.* **92**, 557–569 (2014).
- 755    25.    Waters, C. M. & Bassler, B. L. The *Vibrio harveyi* quorum-sensing system uses  
756            shared regulatory components to discriminate between multiple autoinducers.  
757            *Genes Dev.* **20**, 2754–2767 (2006).
- 758    26.    González, J. E. & Marketon, M. M. Quorum Sensing in Nitrogen-Fixing Rhizobia.  
759            *Microbiol. Mol. Biol. Rev.* **67**, 574–592 (2003).
- 760    27.    Lee, J. & Zhang, L. The hierarchy quorum sensing network in *Pseudomonas*  
761            *aeruginosa*. *Protein Cell* **6**, 26–41 (2015).
- 762    28.    Alon, U. Network motifs: Theory and experimental approaches. *Nat. Rev. Genet.*  
763            **8**, 450–461 (2007).
- 764    29.    Ross-Gillespie, A. & Kümmerli, R. Collective decision-making in microbes. *Front.*  
765            *Microbiol.* **5**, 1–12 (2014).
- 766    30.    Cornforth, D. M. *et al.* Combinatorial quorum sensing allows bacteria to resolve  
767            their social and physical environment. *Proc. Natl. Acad. Sci.* **111**, 4280–4284  
768            (2014).
- 769    31.    Schuster, M., Lostroh, C. P., Ogi, T. & Greenberg, E. P. Identification, timing, and  
770            signal specificity of *Pseudomonas aeruginosa* quorum-controlled genes: A  
771            transcriptome analysis. *J. Bacteriol.* **185**, 2066–2079 (2003).
- 772    32.    Lewontin, R. C. On the measurement of relative variability. *Syst. Zool.* **15**, 141–  
773            142 (1966).
- 774    33.    Chen, R., Déziel, E., Groleau, M.-C., Schaefer, A. L. & Greenberg, E. P. Social  
775            cheating in a *Pseudomonas aeruginosa* quorum-sensing variant. *Proc. Natl. Acad.*

- 776 *Sci.* 201819801 (2019). doi:10.1073/PNAS.1819801116
- 777 34. Gillespie, D. T. A general method for numerically simulating the stochastic time  
778 evolution of coupled chemical reactions. *Journal of Computational Physics* **22**,  
779 (1976).
- 780 35. Cabrol, S., Olliver, A., Pier, G. B., Andremont, A. & Ruimy, R. Transcription of  
781 Quorum-Sensing System Genes in Clinical and Environmental Isolates of  
782 *Pseudomonas aeruginosa*. *J. Bacteriol.* **185**, 7222–7230 (2003).
- 783 36. Schuster, M., Urbanowski, M. L. & Greenberg, E. P. Promoter specificity in  
784 *Pseudomonas aeruginosa* quorum sensing revealed by DNA binding of purified  
785 LasR. *Proceedings of the National Academy of Sciences of the United States of*  
786 *America* **101**, (2004).
- 787 37. Mitri, S. & Foster, K. R. Pleiotropy and the low cost of individual traits promote  
788 cooperation. *Evolution (N. Y.)*. **70**, 488–494 (2016).
- 789 38. Diggle, S. P., Griffin, A. S., Campbell, G. S. & West, S. A. Cooperation and conflict  
790 in quorum-sensing bacterial populations. *Nature* **450**, 411–414 (2007).
- 791 39. Darch, S. E., West, S. A., Winzer, K. & Diggle, S. P. Density-dependent fitness  
792 benefits in quorum-sensing bacterial populations. *Proc. Natl. Acad. Sci. U. S. A.*  
793 **109**, 8259–8263 (2012).
- 794 40. Fujimoto, K. & Sawai, S. A Design Principle of Group-level Decision Making in Cell  
795 Populations. *PLoS Comput Biol* **9**, 1003110 (2013).
- 796 41. Williams, P. & Cámara, M. Quorum sensing and environmental adaptation in  
797 *Pseudomonas aeruginosa*: a tale of regulatory networks and multifunctional signal  
798 molecules. *Curr. Opin. Microbiol.* **12**, 182–191 (2009).
- 799 42. Seet, Q. & Zhang, L. H. Anti-activator QslA defines the quorum sensing threshold

- 800 and response in *Pseudomonas aeruginosa*. *Mol. Microbiol.* **80**, 951–965 (2011).
- 801 43. Eldar, A. & Elowitz, M. B. Functional roles for noise in genetic circuits. *Nature* **467**,
- 802 167–73 (2010).
- 803 44. Mridha, S. & Kümmerli, R. From heterogeneity to homogeneity: coordination of
- 804 siderophore gene expression among clonal cells of the bacterium *Pseudomonas*
- 805 *aeruginosa* Corresponding authors Competing interests. *bioRxiv*
- 806 2021.01.29.428812 (2021). doi:10.1101/2021.01.29.428812
- 807 45. Schiessl, K. T. *et al.* Individual- versus group-optimality in the production of
- 808 secreted bacterial compounds. *Evolution (N. Y.)*. **73**, 675–688 (2019).
- 809 46. Bettenworth, V. *et al.* Phenotypic Heterogeneity in Bacterial Quorum Sensing
- 810 Systems. *J. Mol. Biol.* (2019). doi:10.1016/j.jmb.2019.04.036
- 811 47. Pelet, S. *et al.* Transient activation of the HOG MAPK pathway regulates bimodal
- 812 gene expression. *Science (80-. )*. **332**, 732–735 (2011).
- 813 48. Ozbudak, E. M., Thattai, M., Lim, H. H., Shraiman, B. I. & Van Oudenaarden, A.
- 814 Multistability in the lactose utilization network of *Escherichia coli*. *Nature* **427**, 737–
- 815 740 (2004).
- 816 49. Veening, J. W., Smits, W. K. & Kuipers, O. P. Bistability, epigenetics, and bet-
- 817 hedging in bacteria. *Annual Review of Microbiology* **62**, 193–210 (2008).
- 818 50. Thattai, M. & Van Oudenaarden, A. Stochastic gene expression in fluctuating
- 819 environments. *Genetics* **167**, 523–530 (2004).
- 820 51. Kussell, E. & Leibler, S. Ecology: Phenotypic diversity, population growth, and
- 821 information in fluctuating environments. *Science (80-. )*. **309**, 2075–2078 (2005).
- 822 52. Beaumont, H. J. E., Gallie, J., Kost, C., Ferguson, G. C. & Rainey, P. B.
- 823 Experimental evolution of bet hedging. *Nature* **462**, 90–93 (2009).

- 824 53. Ratcliff, W. C. & Denison, R. F. Individual-level bet hedging in the bacterium  
825 *Sinorhizobium meliloti*. *Curr. Biol.* **20**, 1740–1744 (2010).
- 826 54. Schreiber, F. *et al.* Phenotypic heterogeneity driven by nutrient limitation promotes  
827 growth in fluctuating environments. *Nat. Microbiol.* **1**, 1–7 (2016).
- 828 55. Rattray, J., Thomas, S., Wang, Y. & Brown, S. Bacterial quorum sensing allows  
829 graded responses to variations in density, on both individual and population  
830 scales. (2019). doi:10.1101/850297
- 831 56. Pérez-Velázquez, J., Gölgeli, M. & García-Contreras, R. Mathematical Modelling  
832 of Bacterial Quorum Sensing: A Review. *Bull. Math. Biol.* **78**, 1585–1639 (2016).
- 833 57. Bauer, M., Knebel, J., Lechner, M., Pickl, P. & Frey, E. Ecological feedback in  
834 quorum-sensing microbial populations can induce heterogeneous production of  
835 autoinducers. *Elife* **6**, (2017).
- 836 58. Choi, K. H. & Schweizer, H. P. mini-Tn7 insertion in bacteria with single *attTn7*  
837 sites: Example *Pseudomonas aeruginosa*. *Nat. Protoc.* **1**, 153–161 (2006).
- 838 59. Rezzoagli, C., Granato, E. T. & Kümmerli, R. In-vivo microscopy reveals the  
839 impact of *Pseudomonas aeruginosa* social interactions on host colonization. *ISME*  
840 *J.* **13**, 2403–2414 (2019).

841

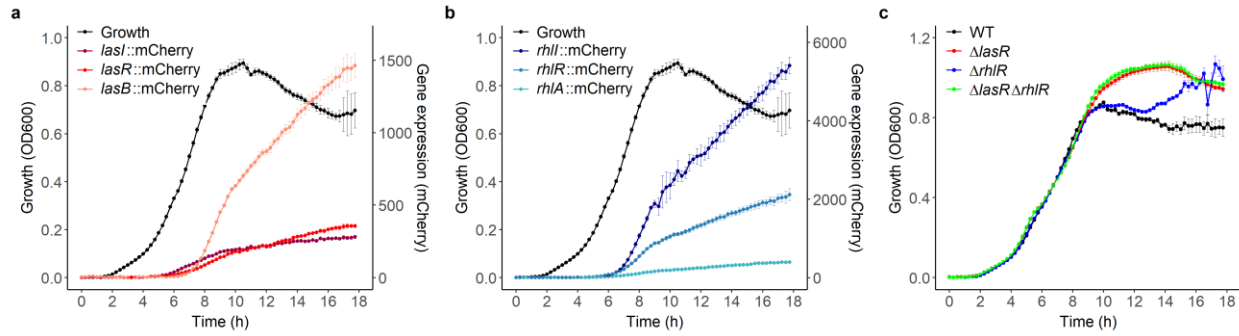

842

843 **Fig. 1 QS activity and growth in LB medium.** Overlay of growth of wild type *P.*  
844 *aeruginosa* PAO1 strain and the expression of the QS signal synthase, the cognate QS  
845 receptor and a QS-regulated downstream gene within the Las (a) and Rhl (b) systems.  
846 Gene expression was measured as mCherry fluorescence and reported as fluorescence  
847 units, blank corrected by the background fluorescence of the wild type untagged strain.  
848 (c) Growth kinetic of QS mutants ( $\Delta lasR$ ,  $\Delta rhlR$  and  $\Delta lasR\Delta rhlR$  mutants) in  
849 comparison to the wild type (WT). Data shows the mean ( $\pm$  standard deviation) of gene  
850 expression or growth across 6 independent replicates.

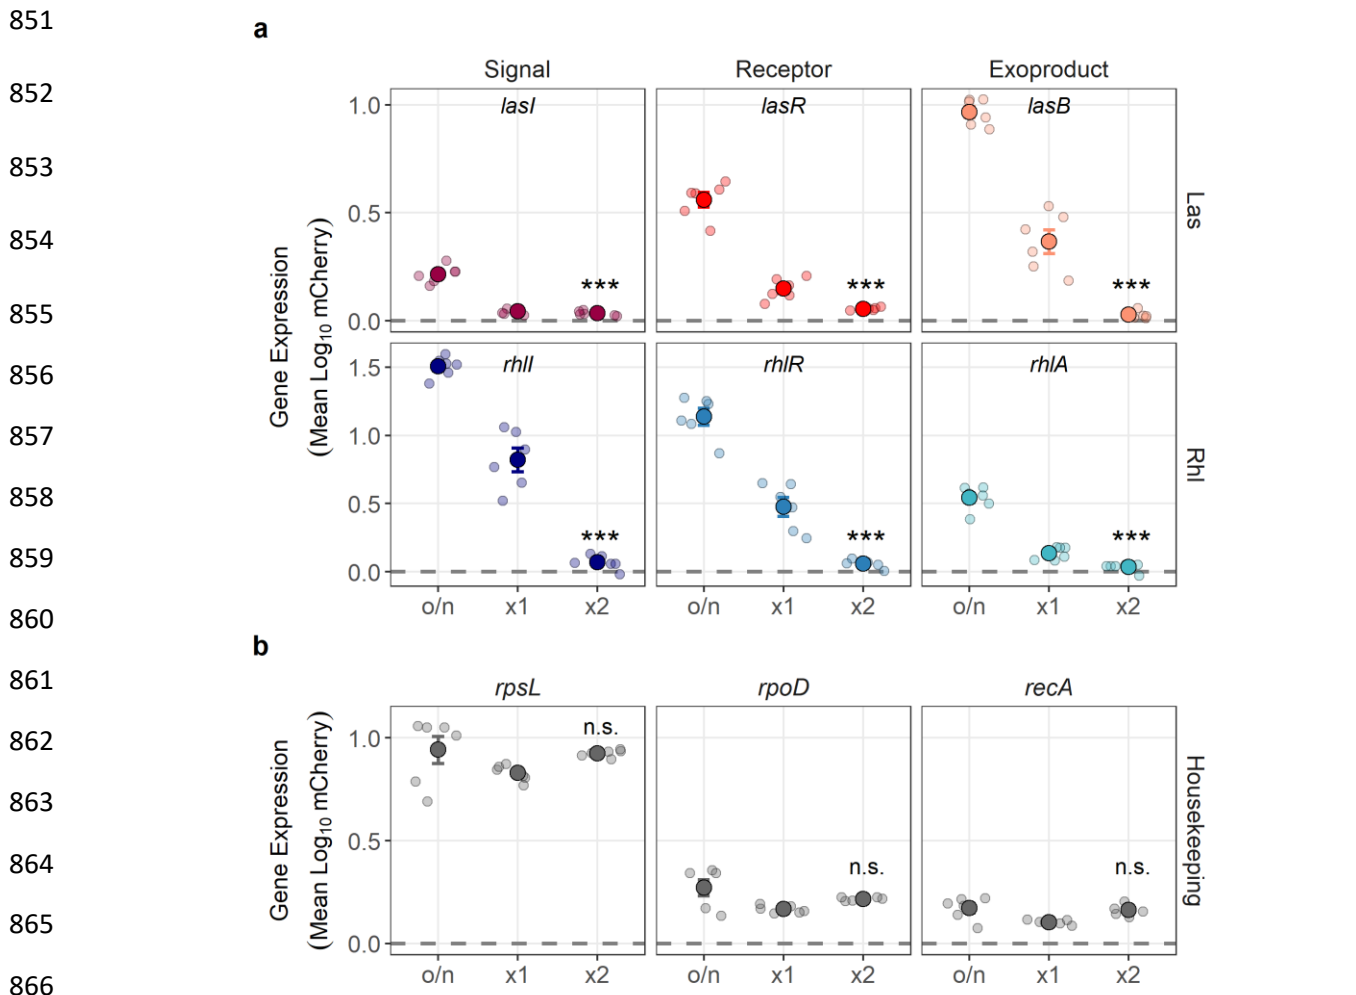

867 **Fig. 2 QS gene expression is switched off after prolonged exposure to low cell**  
868 **density.** (a) Expression of QS genes in overnight cultures (o/n) and after one (x1) or two  
869 (x2) re-inoculation steps (3 hours each) in fresh LB medium. (b) Expression of  
870 housekeeping genes in cultures that underwent the same re-inoculation procedure.  
871 Dotted lines denote the mean background fluorescence. Data is the mean  $\pm$  standard  
872 deviation of gene expression across 6 independent replicates (smaller circles). Asterisks  
873 indicate whether gene expression after two re-inoculations is significantly different from  
874 the expression in the overnight cultures (based on Welch's two-sample t-tests: n.s. = not  
875 significant, \*\*\*  $p < 0.001$ ).

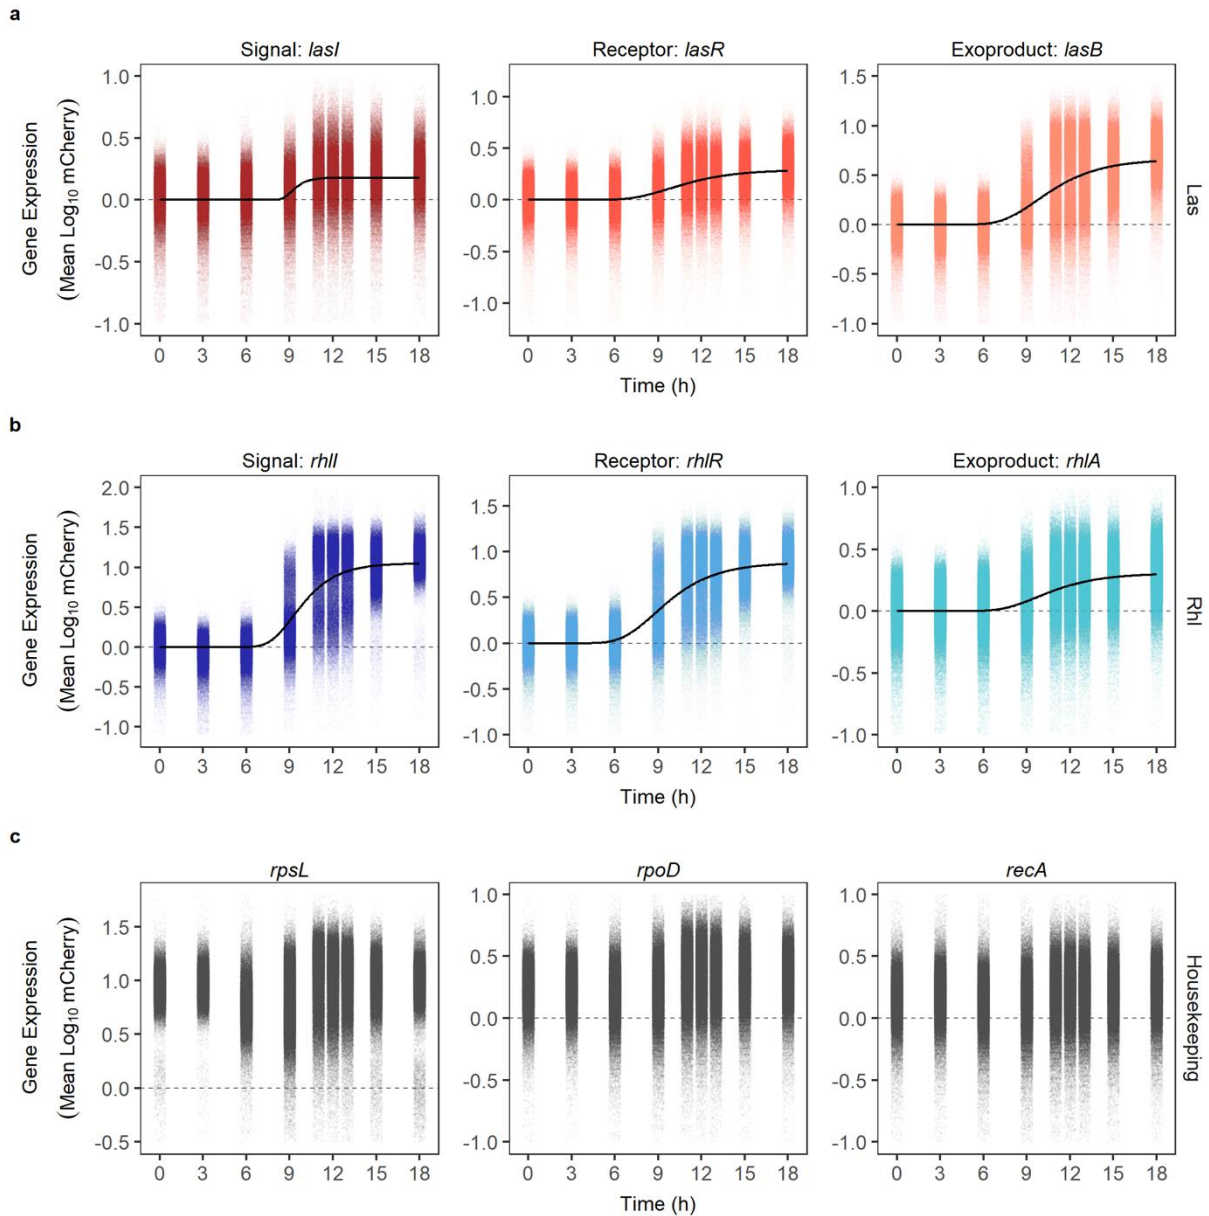

876  
877 **Fig. 3 Single-cell QS gene expression patterns over time.** Single-cell expression of  
878 *las* (a), *rhl* (b) and three housekeeping genes (c) over an 18-hour growth cycle in LB  
879 medium. Each dot represents a single cell (N = 50,000 per time point) detected and  
880 measured with flow cytometry. The expression of each gene was measured in wild type  
881 *P. aeruginosa* PAO1 cells with chromosomally integrated single-copy mCherry  
882 fluorescent reporters, whereby fluorescence intensity was used as a proxy for gene  
883 expression activity. Gene expression has been background subtracted by the  
884 fluorescence of the non-fluorescent wild type strain. Dashed lines at y = 0 represent the

885 threshold value below which there is no measurable gene expression activity. Black  
886 lines show the best model fit (Gompertz function) capturing the temporal dynamics of  
887 single-cell gene expression. Because of differences in the reporter strengths, the y-axis  
888 scale varies across panels. The figure is a representative data set from one out of three  
889 complete experimental repeats (see Supplementary Fig. 2 for the other two repeats).



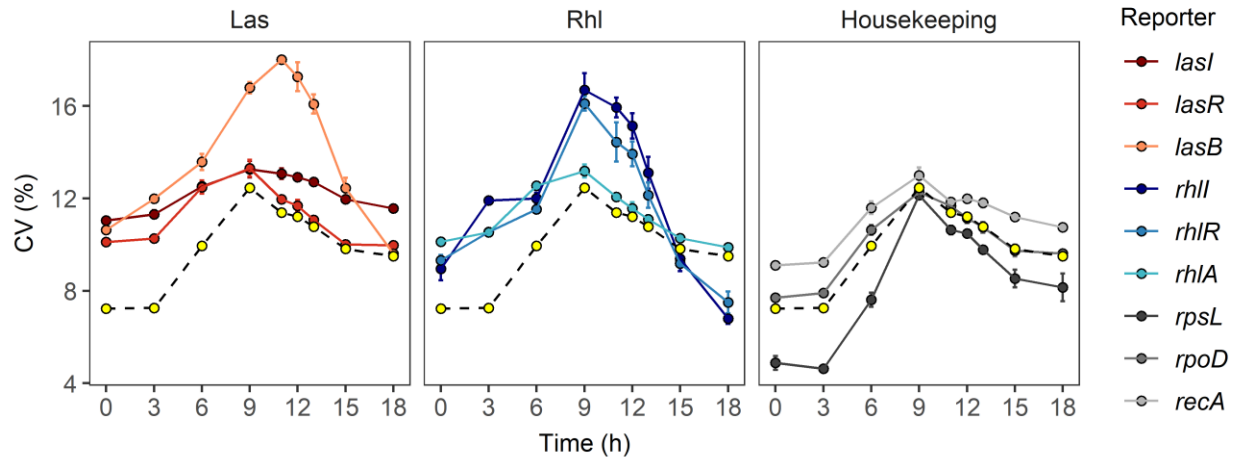

890

891 **Fig. 4 Heterogeneity in gene expression is higher for QS than for housekeeping**  
892 **genes and peaks at intermediate time points.** Panels show the coefficient of variation  
893 (CV = percentage of the standard deviation of a sample divided by its mean) for the *las*,  
894 *rhl* and housekeeping genes. Yellow dots connected with the dashed line represent the  
895 average CV values across three housekeeping genes. Data is shown as mean  $\pm$   
896 standard error of the CV values across three independent replicates.

897

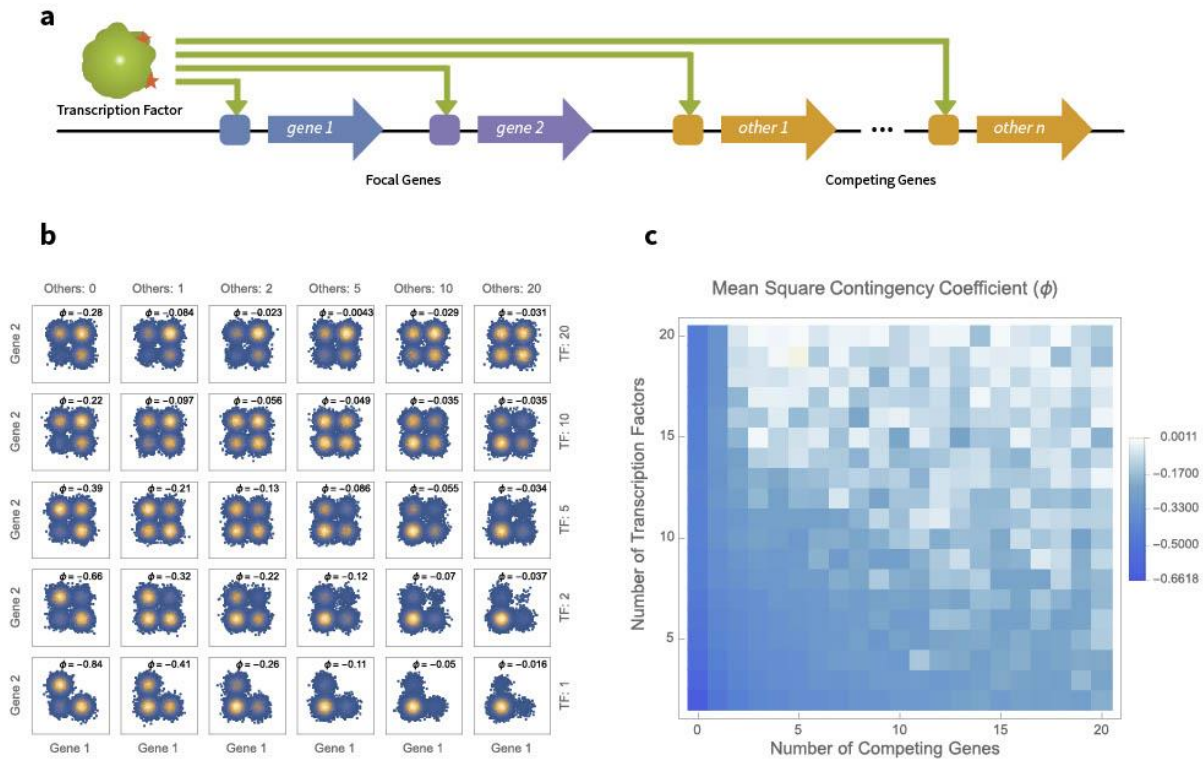

898

899 **Fig. 5 Low number of transcription factor (TF) and competing genes reveal**  
 900 **negative correlations between the expression of two regulatorily-linked QS genes.**

901 (a) The Las signal-receptor dimer acts as a TF for two focal QS genes, as well as a  
 902 number of other competing genes. (b) Relative occupancy of two focal gene promoters  
 903 as a function of the number of TF complexes available and the number of additional  
 904 genes competing for those complexes. Each point represents a simulated bacterial cell.  
 905 Each modelled scenario is based on 20,000 simulated cells for a representative  
 906 selection of parameter combinations. Gaussian noise is added to help distinguish  
 907 individual cells. Correlations are quantified by the mean square contingency coefficient  
 908 ( $\phi$ ), calculated without added noise. (c) Correlation heatmap between occupancy states  
 909 of focal gene promoters as a function of the number of TFs available and the number of  
 910 additional genes competing for the same TFs for all simulated parameter combinations.

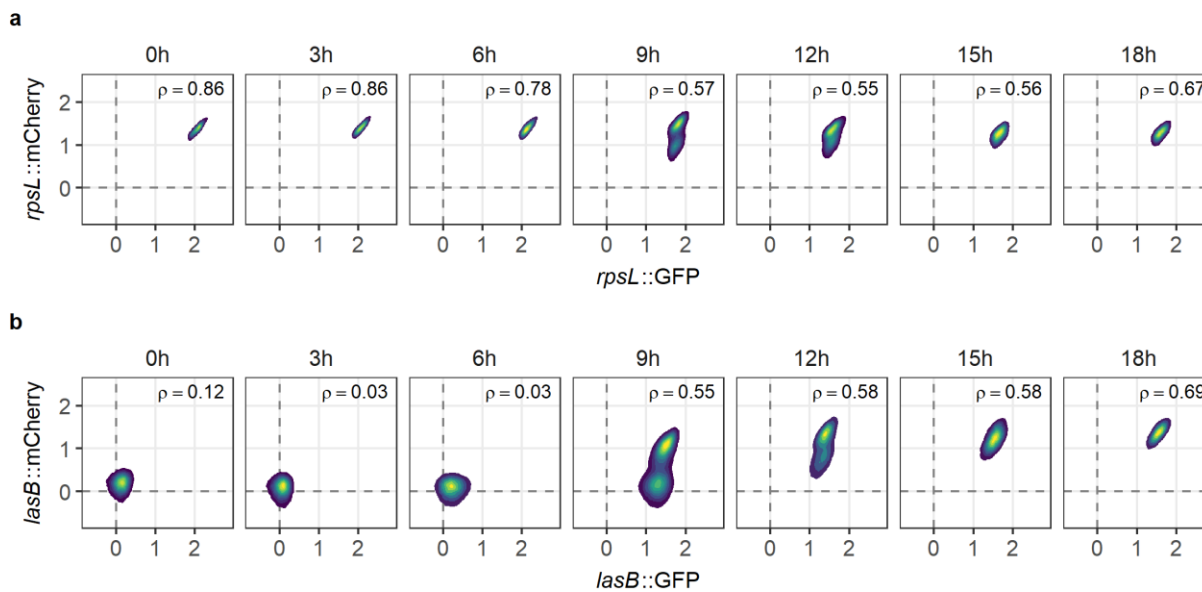

911

912 **Fig. 6 Double reporter control experiments reveal both positive correlations of**

913 **gene expression and substantial intrinsic noise.** Double gene expression reporters,

914 where the promoter of the same gene – (a) the housekeeping gene, *rpsL*; (b) the QS

915 gene, *lasB* – were fused to both the GFP and mCherry. Constructs were chromosomally

916 integrated as single copies into the *P. aeruginosa* PAO1 wild type. (a) For *rpsL*, positive

917 correlations were observed for all time points with an intermittent decline in the strength

918 of the association during the exponential growth phase. (b) For *lasB*, the gene was

919 initially not expressed, but positive correlations built up over time. Spearman correlation

920 coefficient ( $\rho$ ) below one indicates that there is substantial intrinsic noise in gene

921 expression. Fluorescence data across 50,000 single cells are shown as 2D density plot,

922 where yellow and blue areas represent the densest and least dense regions,

923 respectively. Data stems from one representative experiment out of a total of three

924 independent replicates.

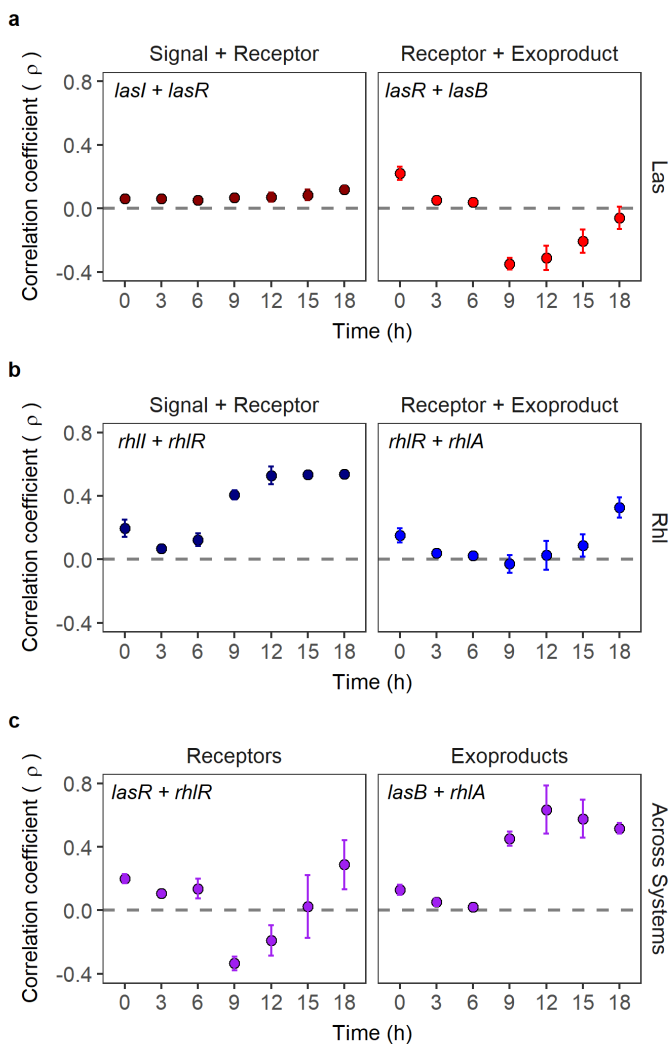

925  
926 **Fig. 7 Strong positive correlations of QS downstream gene expression involve a**  
927 **transient segregation of cells with regard to *lasR* expression.** Double gene  
928 expression reporters were used to simultaneously quantify the investment of single cells  
929 into two QS genes. Panels show the correlation in gene expression across 50,000 cells  
930 for (a) the Las-QS system: signal to receptor and receptor to downstream genes; (b) the  
931 Rhl-QS system: signal to receptor and receptor to downstream genes; (c) between QS-  
932 systems: Las to Rhl receptor and Las to Rhl downstream genes. Correlations are  
933 calculated using Spearman's rank correlation coefficient ( $\rho$ ), which can range from -1  
934 (max. negative correlation) to 1 (max. positive correlation). Data points show means  $\pm$   
935 standard deviation across three independent replicates.

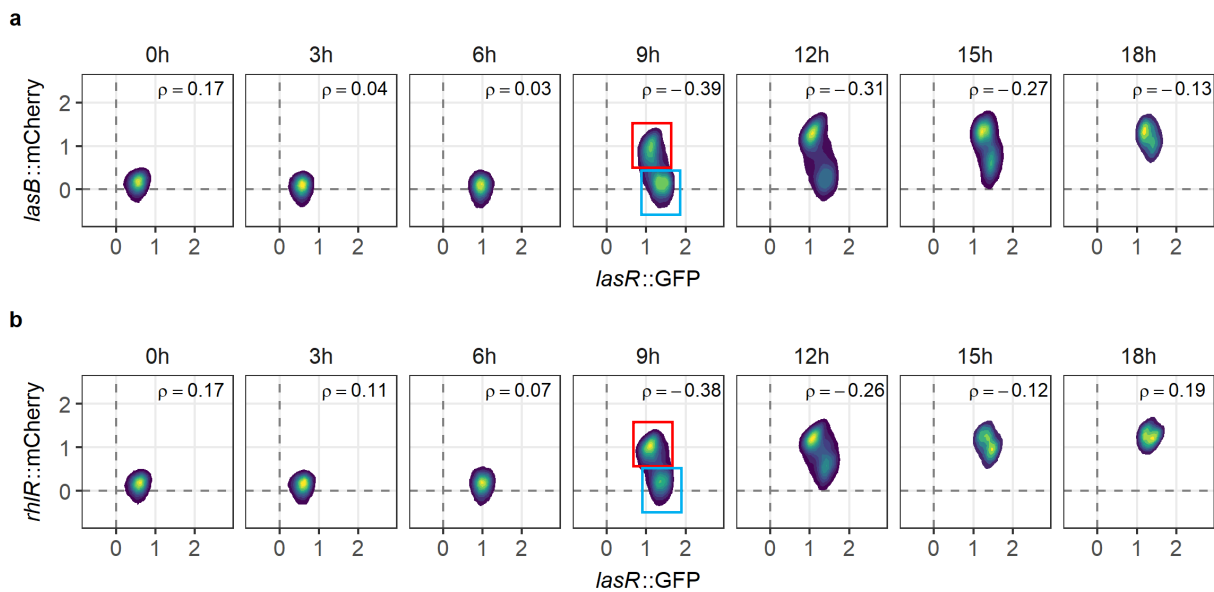

936  
937 **Fig. 8 Clonal cells form subpopulations that transiently differ in their QS gene**  
938 **expression activities.** Simultaneous single-cell expression of *lasR* and its downstream  
939 genes – (a) *lasB* and (b) *rhIR* – was measured using double fluorescent gene reporters.  
940 The population of cells began expressing *lasR* homogeneously (6<sup>th</sup> hour), and split into  
941 two subpopulations, expressing either (i) high *lasR*, but no *lasB* or *rhIR* (blue box), or (ii)  
942 low *lasR* but high *lasB* and *rhIR* expression (red box). The fraction of cells belonging to  
943 subpopulation (i) declined at the later time points, resulting in one population with rather  
944 uniform gene expression activities. Fluorescence data across 50,000 single cells are  
945 shown as 2D density plot, where yellow and blue areas represent the densest and least  
946 dense regions, respectively. Dotted lines represent mean background fluorescence in  
947 the mCherry and GFP channels. Spearman's rank correlation coefficient ( $\rho$ ) between the  
948 expression of two genes are shown in each panel. Data stems from one representative  
949 experiment out of a total of three independent replicates.

950
